# Supplementary material for: The Spo13/Meikin pathway confines the onset of gamete differentiation to meiosis II in yeast
Source: PubMed Central journal article supplement (PMC8844990; doi:10.15252/embj.2021109446), 2022-01-13
Supplement: EMBJ-41-e109446-s005.pdf [file EMBJ-41-e109446-s005.pdf]

## Expanded View Figures

### Figure EV1. Analysis of Spo13 function in cells lacking APC/C activators.

- A Deletion of *AMA1* blocks spore formation and reduces nuclear division (to < 5%) in *P<sub>HSL1</sub>-CDC20 spo13Δ* and *P<sub>HSL1</sub>-CDC20 clb1Δ* cells. Images were taken at 23 h in SPM. Nuclei are labeled with TetR-RFP. Scale bar, 2 μm.
- B Imaging of SPBs (Cnm67-RFP) and Spc72-GFP or Mpc70-GFP in *SPO13* and *spo13Δ* cells lacking all three APC/C activators. Top, time-lapse series. Bottom, meiotic events were quantified in cells synchronized *in silico* to SPB separation at entry into metaphase I ( $t = 0$ ). Graphs show overlays of *SPC72-GFP* and *MPC70-GFP* strains. Data are representative of three independent experiments.
- C Immunoblot detection of proteins in whole-cell extracts from control cells and from *SPO13* and *spo13Δ* cells lacking all three APC/C activators. C, sample from proliferating cells. The asterisk marks a non-specific band.
- Source data are available online for this figure.

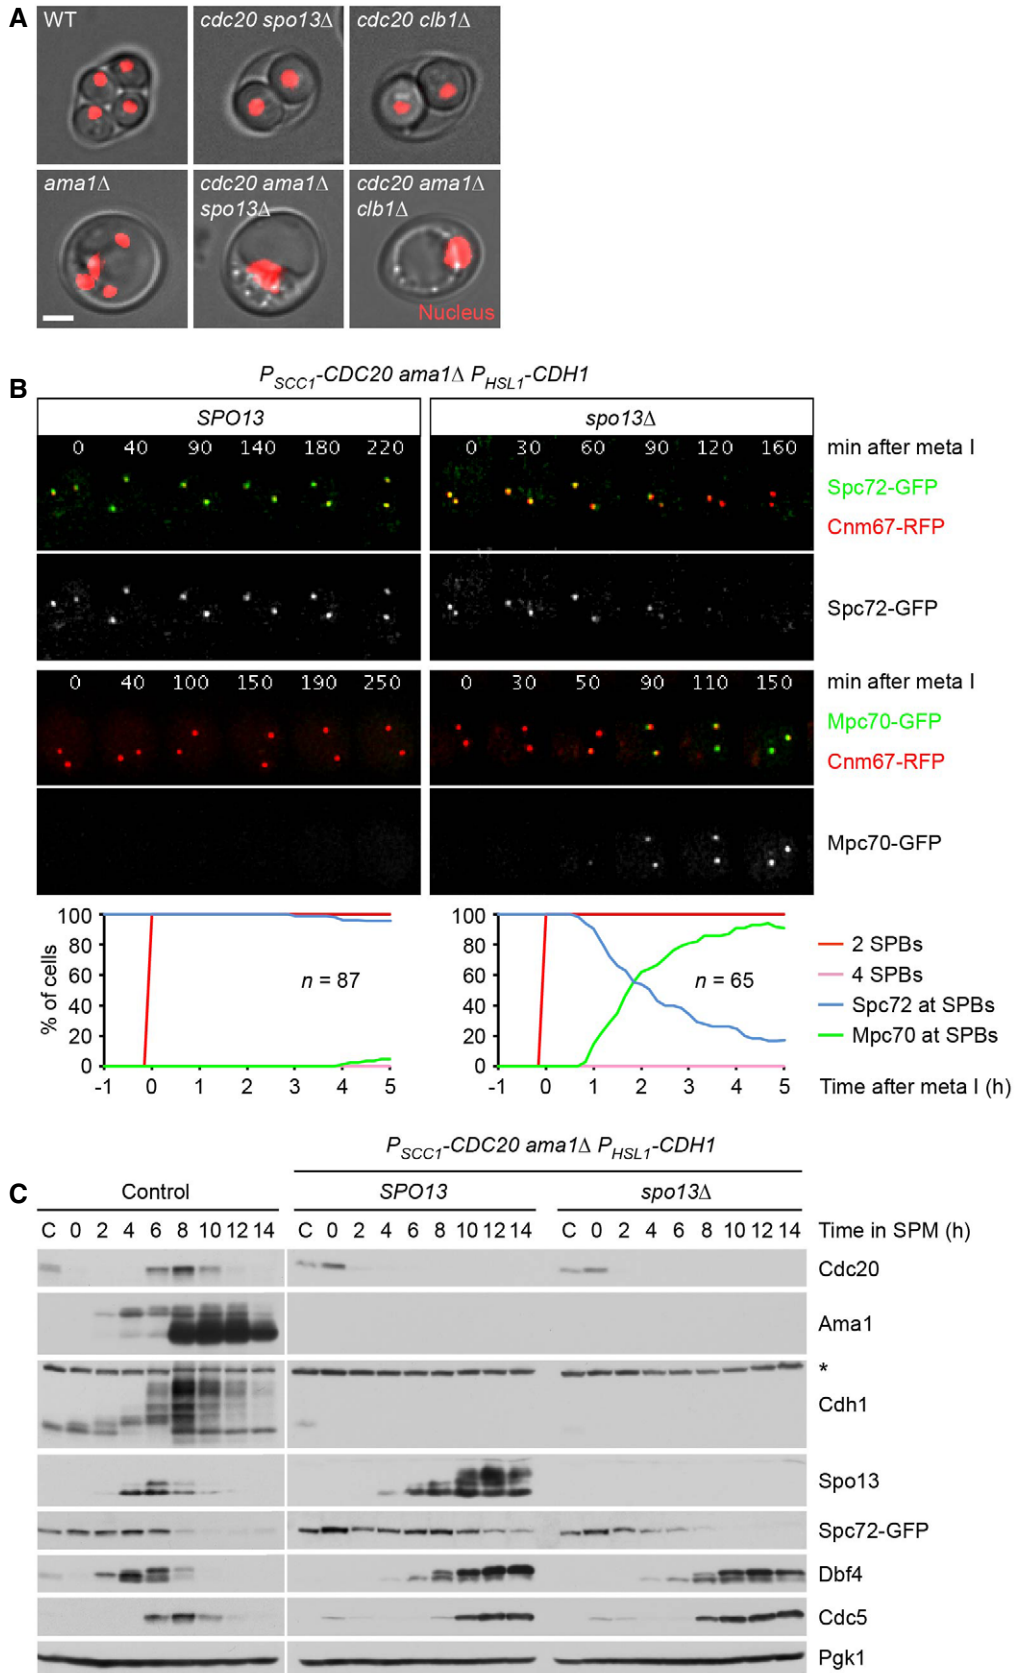

Figure EV1.

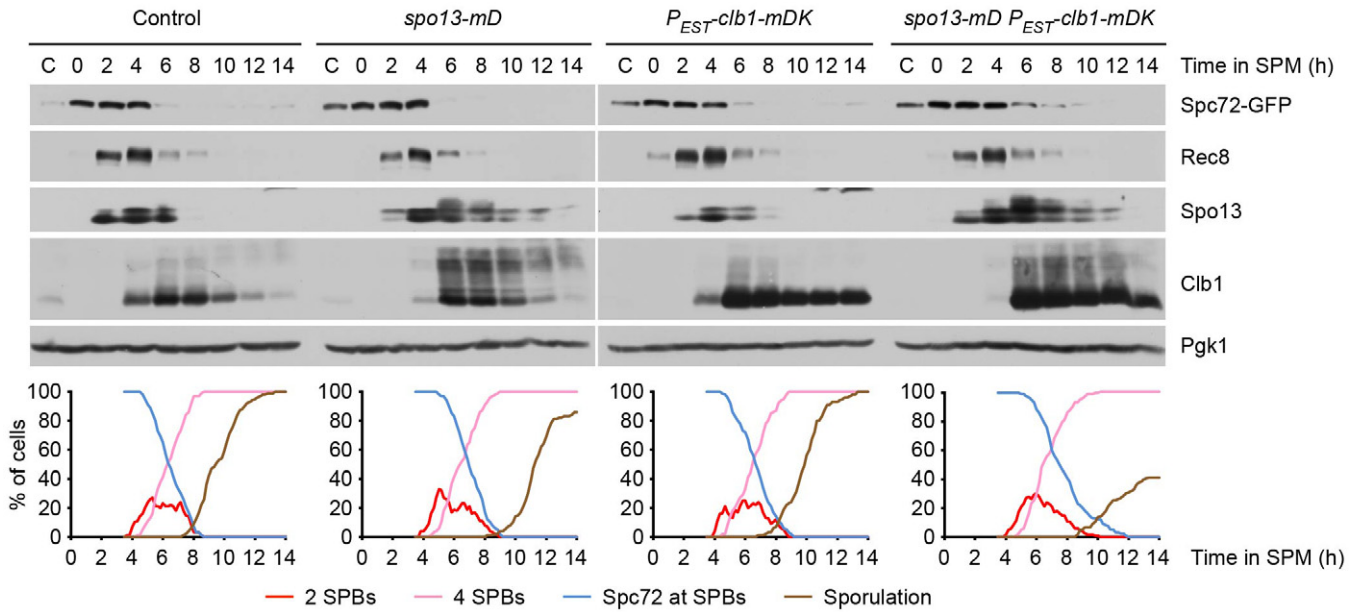

**Figure EV2. Protein levels in strains expressing non-degradable Spo13 and/or Clb1.**

Analysis of meiosis in cells containing Spo13-mD and/or expressing Clb1-mDK from the  $P_{EST}$  promoter. Estradiol was added at 4 h in SPM to induce  $P_{EST}$ -*clb1-mDK*. Top, immunoblot detection of proteins in whole-cell extracts. C, sample from proliferating cells. Bottom, culture aliquots were subjected to live-imaging of SPBs (Cnm67-RFP) and Spc72-GFP. Graphs show quantification of meiotic events ( $n = 100$  cells per strain).

Source data are available online for this figure.

**Figure EV3. Regulation of Spo13 by Cdk1 activity.**

- A Imaging of SPBs (Cnm67-RFP) and Spc72-GFP in *ndt80Δ* and *ndt80Δ spo13Δ* cells induced to express  $P_{EST}$ -*IME2-ΔC* plus  $P_{EST}$ -*CDC5* at 4 h in SPM ( $t = 0$ ). Top, time-lapse series. Bottom, quantification of cells with Spc72 at SPBs. In *ndt80Δ* cells, the *SPO13* deletion causes only a small advance in Spc72 removal (19 min; 95% CI, 8–30;  $P = 0.001$ ; Welch's  $t$ -test).
- B Immunoblot detection of Spo13, Spo13-10A, and Spo13-10D in whole-cell extracts from  $P_{HSL1}$ -*CDC20* *ama1Δ* cells progressing into metaphase I. Cdc28-as2 was inhibited with 1Na-PP1 at 8 h in SPM (arrow). C, sample from proliferating cells.
- C, D Imaging of SPBs (Cnm67-RFP) and Spc72-GFP in  $P_{HSL1}$ -*CDC20* *ama1Δ* cells containing different *SPO13* alleles. (C) Time-lapse series of *spo13-10A* and *spo13-10D* cells. (D) Spc72's presence at SPBs was quantified in *spo13-10A*, *spo13-10D*, *spo13Δ*, and control cells synchronized *in silico* to SPB separation at entry into metaphase I ( $t = 0$ ). *spo13-10D* cells remove Spc72 with similar timing after entry into metaphase I as *spo13Δ* cells ( $P = 0.64$ , Welch's  $t$ -test).

Data information: Data are representative of two (A) or three (C, D) independent experiments.

Source data are available online for this figure.

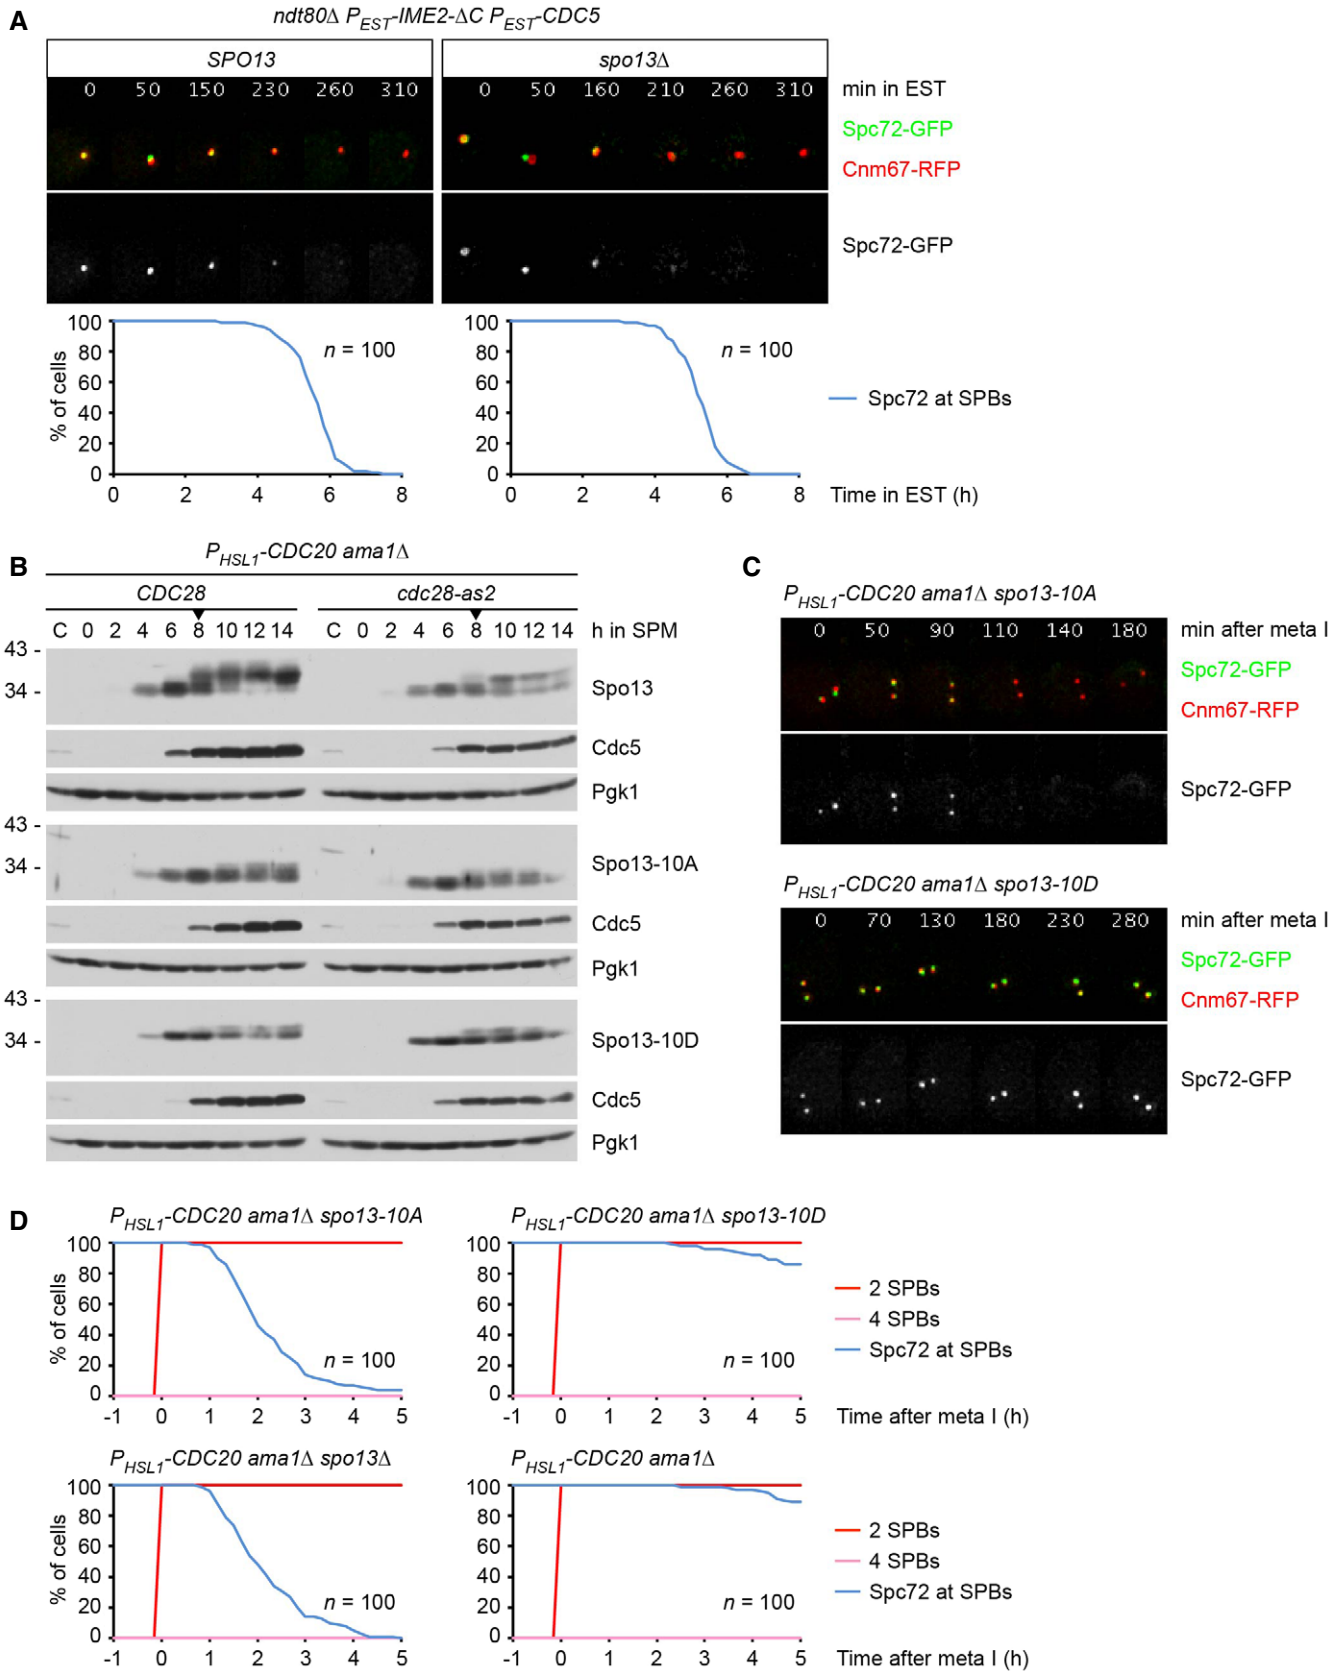

Figure EV3.

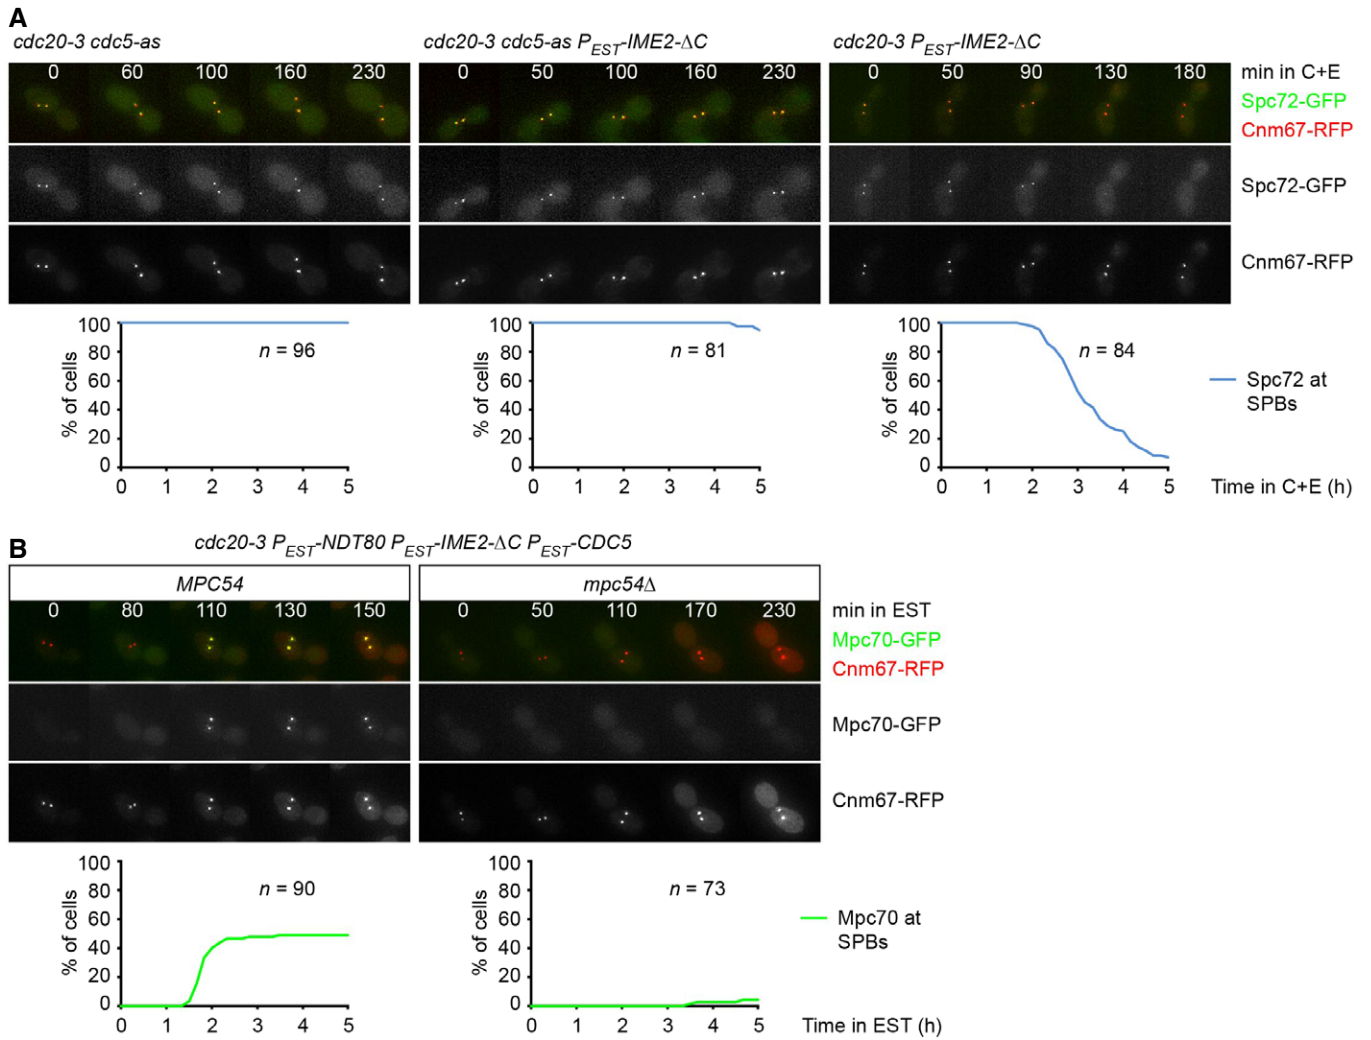

**Figure EV4. Analysis of Spc72 removal and MP assembly in mitotic cells.**

A Mitotic *cdc20-3* cells containing *cdc5-as* and/or *P<sub>EST</sub>-IME2-ΔC* were shifted to 36°C for 80 min. At *t* = 0, cells were treated with CMK and estradiol (C + E) to inhibit Cdc5-as and induce *P<sub>EST</sub>-IME2-ΔC*, respectively. Top, time-lapse series from the imaging of SPBs (Cnm67-RFP) and Spc72-GFP. Frame width, 19 μm. Bottom, quantification of cells with Spc72-GFP at SPBs.

B Mitotic *cdc20-3 MPC54* and *cdc20-3 mpc54Δ* cells containing *P<sub>EST</sub>-NDT80*, *P<sub>EST</sub>-IME2-ΔC*, and *P<sub>EST</sub>-CDC5* were shifted to 36°C for 30 min and treated with estradiol (*t* = 0). Top, time-lapse series from the imaging of SPBs (Cnm67-RFP) and Mpc70-GFP. Frame width, 19 μm. Bottom, quantification of cells with Mpc70-GFP at SPBs.

Data information: Data are representative of two (A) or three (B) independent experiments.

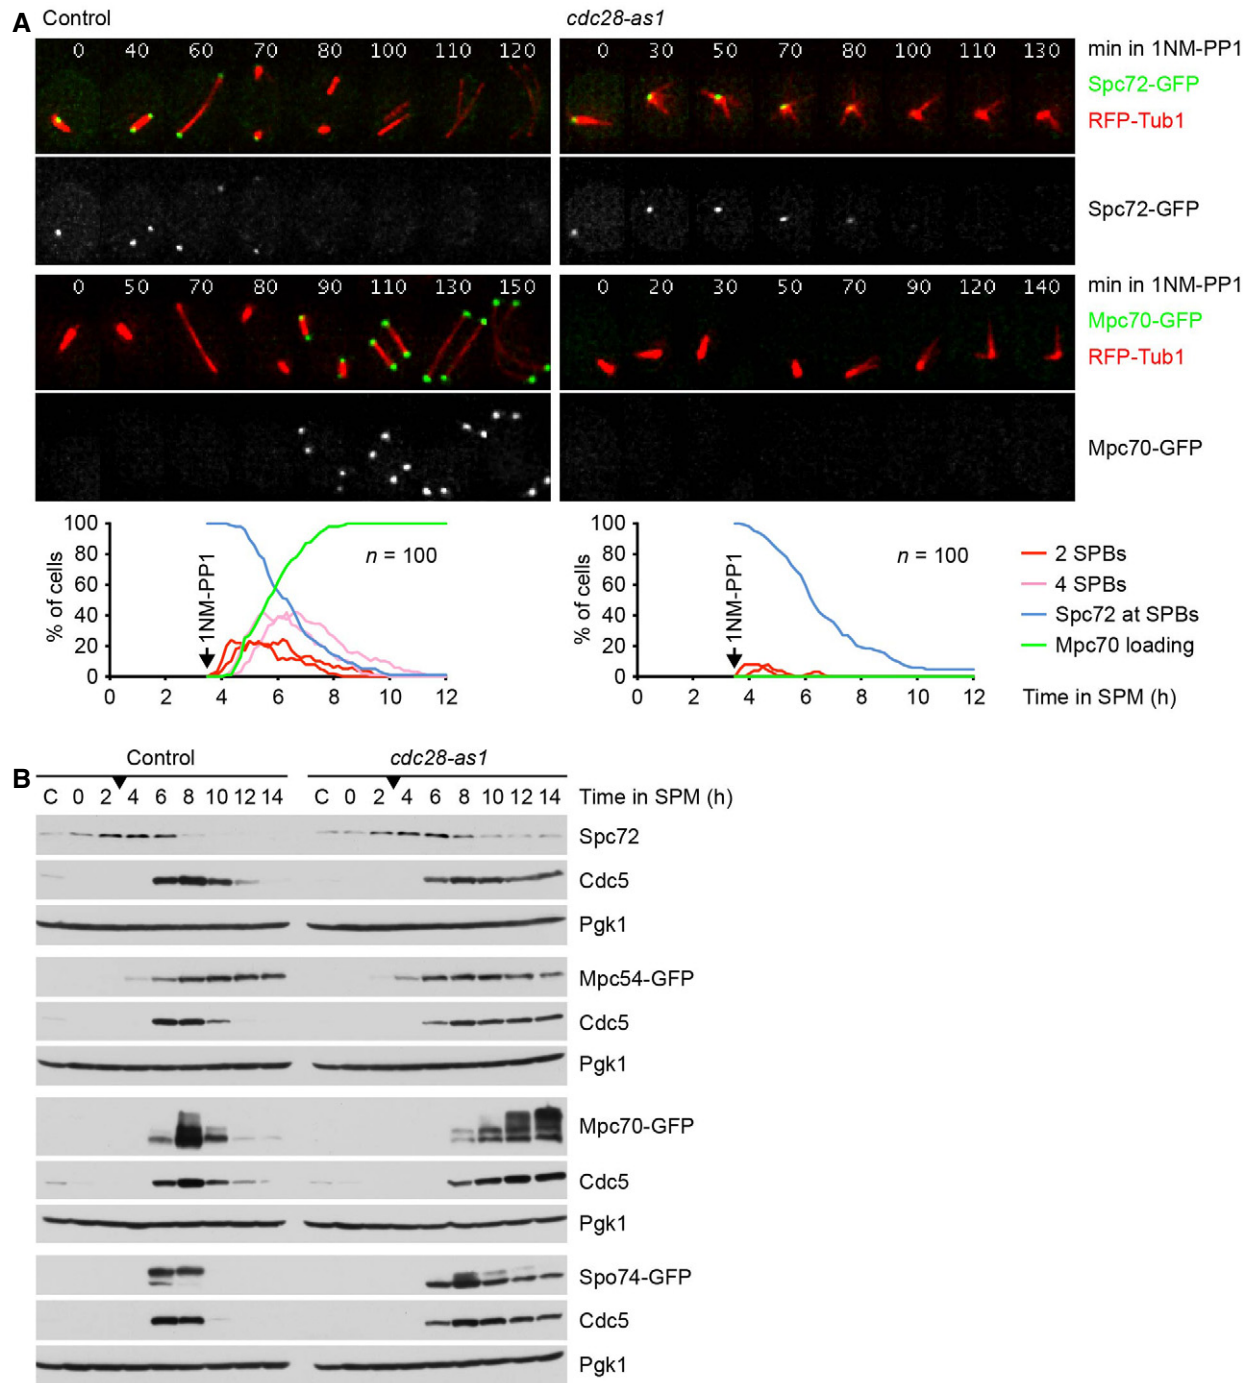

**Figure EV5. Analysis of Spc72 and MP proteins after inhibition of Cdk1.**

A Imaging of microtubules (RFP-Tub1) and Spc72-GFP or Mpc70-GFP in control and *cdc28-as1* cells treated with 1NM-PP1 at 3.5 h in SPM. Top, time-lapse series. Bottom, quantification of meiotic events. Graphs show overlays of *SPC72-GFP* and *MPC70-GFP* strains.

B Immunoblot detection of Spc72 and GFP-tagged MP proteins in whole-cell extracts from control and *cdc28-as1* strains treated with 1NM-PP1 at 3 h in SPM (arrow). The appearance of Cdc5 marks the activation of Ndt80. C, sample from proliferating cells.

Source data are available online for this figure.
